# Supplementary material
Source: MDPI journal article supplement (https://www.mdpi.com/2073-4433/11/8/793)
Supplement: s1 [file s1]

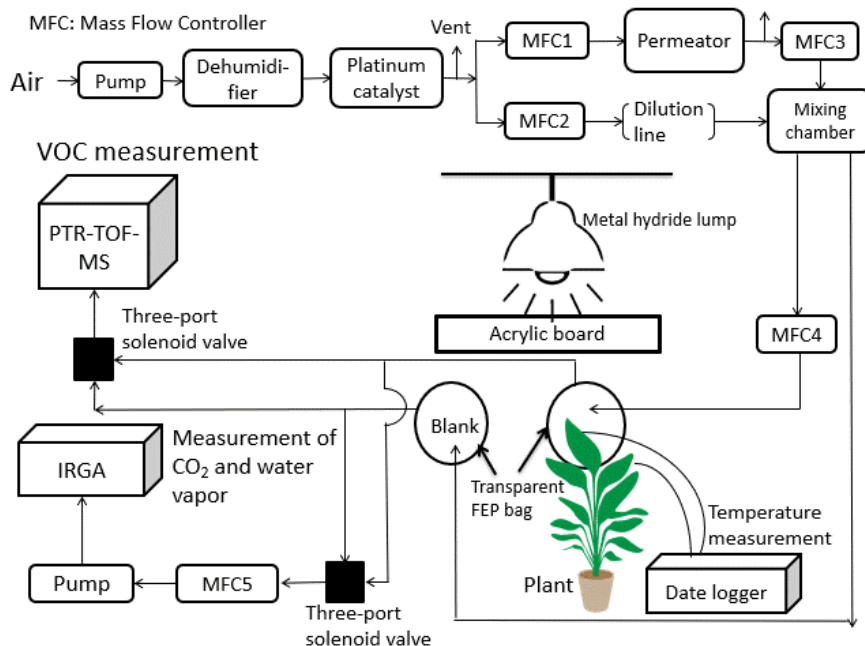

**Figure S1.** Schematic diagram of the VOC fumigation and measurement system

**Table S1.** aldehydes and ketones used in the experiments

| Compound name       | abbreviation | Molecular weight | Rational Formula                               | Henry constant (mol/kg*bar) | Concentration range (ppbv) |
|---------------------|--------------|------------------|------------------------------------------------|-----------------------------|----------------------------|
| Methacrolein        | MACR         | 70               | $\text{CH}_2=\text{C}(\text{CH}_3)\text{CHO}$  | 6.5 <sup>a</sup>            | 10–14                      |
| Methyl vinyl ketone | MVK          | 70               | $\text{CH}_2=\text{CH}(\text{CH}_3)\text{CO}$  | 41 <sup>a</sup>             | 1.4–40                     |
| Methyl ethyl ketone | MEK          | 72               | $\text{CH}_3\text{CH}_2(\text{CH}_3)\text{CO}$ | 20 <sup>b</sup>             | 8–11                       |

a: Iraci et al. (1999), b:NIST Chemistry WebBook

#### References

- Iraci, L.; Baker, B.; Tyndall, G.; Orlando, J. Measurements of the Henry's Law Coefficients of 2-Methyl-3-buten-2-ol, Methacrolein, and Methylvinyl Ketone. *J. Atmos. Chem.* **1999**, *33*, 321-330.
- NIST Chemistry WebBook. Available online: <https://webbook.nist.gov/chemistry/> (accessed on 28 6 2020).
